# Supplementary material for: Cognitive training enhances growth mindset in children through plasticity of cortico-striatal circuits
Source: PubMed Central journal article supplement (PMC9653476; doi:10.1038/s41539-022-00146-7), 2022-11-12
Supplement: 41539_2022_146_MOESM1_ESM.pdf [file 41539_2022_146_MOESM1_ESM.pdf]

1  
2  
3  
4  
5  
6  
7  
8  
9

**Supplementary Information**

**Cognitive training enhances growth mindset in children through plasticity of cortico-striatal circuits**

**Supplementary Results** .....*p.* 2  
**Supplementary Figure 1** .....*p.* 6  
**Supplementary Tables 1 to 10** ..... *p.* 7  
**Supplementary References** ..... *p.* 17

## 10 **Supplementary Results**

### 11 *Observed effect sizes and power: behavior data analyses*

12 We observed that the training group with a sample size of 52 in the behavioral data analyses  
13 (*post-pre change in growth mindset [“growth mindset gain”], relation between growth mindset*  
14 *gain and growth mindset prior to training, and structural equation modeling [SEM] of the link*  
15 *between growth mindset prior to training and math achievement post-training*) was estimated to  
16 have a power ranging from .62 to >.99. The control group with a sample size of 27 (24 for SEM  
17 analysis) in behavioral data analyses was estimated to have a power ranging from .44 to >.99.

18 Observed effect sizes and power can be found in **Supplementary Table 3**.

19

### 20 *Observed effect sizes and power: brain-behavior relations*

21 The training group with a sample size of 38 in neuroimaging data analyses (*relation between*  
22 *post-pre change in brain activation or connectivity and growth mindset gain*) was estimated to  
23 have a power ranging from .56 to .96. The control group with a sample size of 17 was estimated  
24 to have low-to-medium power for brain-behavioral analysis, ranging from .27 to .66. Observed  
25 effect sizes and power can be found in **Supplementary Table 3**.

26

### 27 *Changes in children’s quantity discrimination ability following four weeks of cognitive* 28 *training*

29 Our cognitive training program focused on strengthening children’s fundamental number  
30 knowledge. Children’s training gains were assessed by performance on symbolic quantity  
31 discrimination task administered before and after training (see Chang et al. (2022) for details of  
32 task design). One participant did not have symbolic quantity discrimination task data. A total of

33 78 participants (52 children in the training group, 26 children in the control group) were included  
34 in analysis. A 2-way ANOVA with time (pre-, post-training) and group (training, control)  
35 revealed a significant main effect of time ( $F(1,76) = 23.810, p < .001$ ) and a significant  
36 interaction between time and group on symbolic quantity discrimination task performance  
37 ( $F(1,76) = 12.160, p < .001$ ). No significant main effect of group was observed ( $F(1,76) = 1.301,$   
38  $p = .258$ ). Post-hoc analysis showed that performance gains were significant in the training group  
39 ( $t(51) = -5.998, p < .001$ ) but not in the control group ( $t(25) = .031, p = .976$ ).

40

41 We next examined whether training gains were similar or different between children with MLD  
42 ( $N = 20$ ; see **Methods**) and TD children ( $N = 32$ ) in the training group. In a 2-way ANOVA, we  
43 found a significant main effect of time ( $F(1,50) = 35.701, p < .001$ ) and no significant main  
44 effect of group (MLD, TD) or interaction between time and group ( $F_s < .988; p_s > .324$ ).  
45 Significant training-induced improvements were observed in both groups (MLD:  $t(19) = -2.802,$   
46  $p = .011$ ; TD:  $t(31) = -5.559, p < .001$ ). These findings indicate that training induced changes in  
47 quantity discrimination ability across children with and without math learning difficulties,  
48 consistent with our recent publication (Chang et al., 2022).

49

### 50 *Changes in children's addition problem solving skills following four weeks of cognitive* 51 *training*

52 We further examined whether children's performance on an event-related fMRI task involving  
53 addition problem solving changes in response to training. Eleven participants did not have valid  
54 addition fMRI task data. A total of 68 participants (45 children in the training group, 23 children  
55 in the control group) were included in analysis. A 2-way ANOVA with time (pre-training, post-

56 training) and group (training, control) on addition task accuracy revealed a marginally significant  
57 main effect of time ( $F(1,66) = 3.553, p = .064$ ) and a significant interaction between time and  
58 group ( $F(1,66) = 4.373, p = .040$ ). No significant main effect of group was observed ( $F(1,66) =$   
59  $.992, p = .323$ ). Post hoc analysis showed that improvements were significant in the training  
60 group ( $t(44) = -2.558, p = .014$ ) but not in the control group ( $t(22) = -.728, p = .474$ ).

61  
62 Additional 2-way ANOVA comparing children with MLD ( $N = 16$ ) and TD children ( $N = 29$ ) in  
63 the training group revealed a marginally significant interaction between time and group (MLD,  
64 TD),  $F(1,43) = 3.313, p = .076$  (**Supplementary Table 9**). Significant training-induced  
65 improvements were observed in the MLD subgroup ( $p = .013$ ). These findings suggest that our  
66 cognitive training protocol was effective in enhancing addition problem solving skills beyond  
67 quantity discrimination ability that children were trained on.

68  
69 ***Changes in children's WJ-III Math Fluency scores following four weeks of cognitive training***

70 Finally, in addition to quantity discrimination and addition problem solving skills, we examined  
71 whether our training protocol improved children's math skills more broadly on the Math Fluency  
72 subtest of the WJ-III (a standardized assessment of arithmetic fluency). Five participants did not  
73 have valid WJ-III Math Fluency subtest score. A total of 74 participants (51 children in the  
74 training group, 23 children in the control group) were included in analysis. A 2-way ANOVA  
75 with time (pre-, post-training) and group (training, control) on WJ-III Math Fluency standardized  
76 scores showed a marginally significant main effect of time ( $F(1,72) = 3.273, p = .075$ ) and a  
77 significant main effect of group ( $F(1,72) = 4.682, p = .034$ ). No significant interaction between  
78 time and group was observed ( $F(1,72) = .816, p = .369$ ).

79

80 We additionally assessed training-related changes in WJ-III Math Fluency scores in children  
81 with MLD ( $N = 20$ ) and TD children ( $N = 31$ ). Here, a 2-way ANOVA showed a significant  
82 interaction between time and group (MLD, TD),  $F(1,49) = 7.268$ ,  $p = .010$  (**Supplementary**  
83 **Table 10**) with significant training-induced improvements observed in the MLD subgroup ( $p =$   
84  $.005$ ). These findings suggest that training was particularly effective in children with math  
85 learning difficulties who may have benefited from scaffolding knowledge of numbers to  
86 arithmetic problem solving.

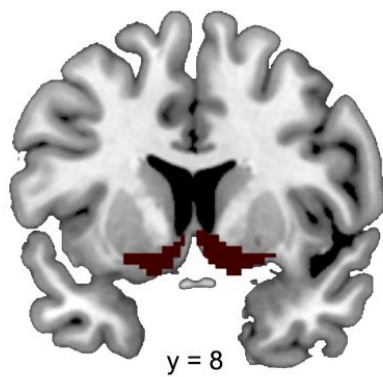

**Bilateral NAc**

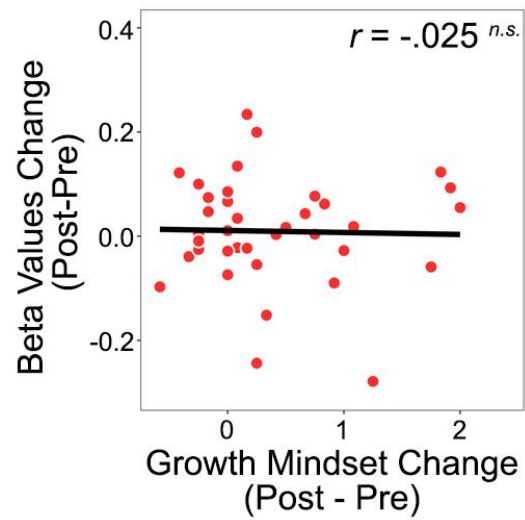

**Supplementary Figure 1.** Change in growth mindset was not significantly associated with change in brain activity in the bilateral nucleus accumbens (NAc) in the training group. *n.s.* = not significant.

**Supplementary Table 1.** Demographic and behavioral profiles of training and control groups

|                           | Training<br>( <i>n</i> = 52) | Control<br>( <i>n</i> = 27) | Chi-square test or two-<br>sample <i>t</i> -test |                 |             |
|---------------------------|------------------------------|-----------------------------|--------------------------------------------------|-----------------|-------------|
| Gender<br>(Female : Male) | 29 : 23                      | 16 : 11                     | $\chi^2 = .003$                                  | <i>p</i> = .954 |             |
|                           | Mean (SD)                    | Mean (SD)                   | <i>t</i>                                         | <i>df</i>       | <i>p</i>    |
| <b>Time 1 (Pre)</b>       |                              |                             |                                                  |                 |             |
| Age                       | 8.18 (.65)                   | 8.26 (.64)                  | -.525                                            | 77              | .601        |
| FSIQ                      | 107.65 (12.80)               | 109.11 (11.02)              | -.503                                            | 77              | .617        |
| Growth mindset            | 4.07 (.73)                   | 3.94 (.83)                  | .695                                             | 77              | .489        |
| Math fluency              | 96.10 (12.97)                | 100.70 (10.29)              | -1.601                                           | 77              | .113        |
| Addition accuracy         | .80 (.17)                    | .86 (.11)                   | -1.622                                           | 66              | .109        |
| <b>Time 2 (Post)</b>      |                              |                             |                                                  |                 |             |
| Age                       | 8.36 (.66)                   | 8.49 (.67)                  | -.828                                            | 77              | .410        |
| Growth mindset            | 4.52 (.49)                   | 4.21 (.79)                  | 2.142                                            | 77              | <b>.035</b> |
| Math fluency              | 97.39 (12.91)                | 104.91 (13.77)              | -2.272                                           | 72              | <b>.026</b> |
| Addition accuracy         | .85 (.12)                    | .85 (.10)                   | .116                                             | 66              | .908        |

**Supplementary Table 2.** Adapted theory of intelligence scale (Dweck, 1999) to assess growth mindset in children

|                                                                            | Very<br>Disagree | Very<br>Disagree | Somewhat<br>disagree | Somewhat<br>agree | Agree | Very<br>Agree |
|----------------------------------------------------------------------------|------------------|------------------|----------------------|-------------------|-------|---------------|
| You can change how good you are at reading.                                | 0                | 1                | 2                    | 3                 | 4     | 5             |
| If you work really hard you can change how good you are at math.           | 0                | 1                | 2                    | 3                 | 4     | 5             |
| If you work really hard you can get smarter.                               | 0                | 1                | 2                    | 3                 | 4     | 5             |
| You can change how good you are at math.                                   | 0                | 1                | 2                    | 3                 | 4     | 5             |
| You can't change how smart you are.                                        | 0                | 1                | 2                    | 3                 | 4     | 5             |
| If you work really hard you can change how good you are at reading.        | 0                | 1                | 2                    | 3                 | 4     | 5             |
| You can't change how good you are at reading.                              | 0                | 1                | 2                    | 3                 | 4     | 5             |
| Even if you work really hard you can't get smarter.                        | 0                | 1                | 2                    | 3                 | 4     | 5             |
| Even if you work really hard you can't change how good you are at math.    | 0                | 1                | 2                    | 3                 | 4     | 5             |
| You can change how smart you are.                                          | 0                | 1                | 2                    | 3                 | 4     | 5             |
| You can't change how good you are at math.                                 | 0                | 1                | 2                    | 3                 | 4     | 5             |
| Even if you work really hard you can't change how good you are at reading. | 0                | 1                | 2                    | 3                 | 4     | 5             |

*Notes:* This questionnaire assessed children’s growth mindset in general intelligence as well as specific academic domains, reading and math. Items 1-4, 6, and 10 were statements about growth mindset and items 5, 7-9, 11, and 12 were statements about fixed mindset. To obtain a total score for growth mindset, fixed mindset items were reverse-coded.



**Supplementary Table 3.** Observed effect sizes and power in training and control groups across various analyses

| Analysis                                                 | Statistical Test            | Training Group<br>(Cohen's <i>d</i> /power) | Control group<br>(Cohen's <i>d</i> /power) |
|----------------------------------------------------------|-----------------------------|---------------------------------------------|--------------------------------------------|
| <b>Behavioral</b>                                        |                             | ( <i>n</i> = 52)                            | ( <i>n</i> = 27; 24 <sup>1</sup> )         |
| Post-Pre change in growth mindset                        | Paired-sample <i>t</i> test | .698/.998                                   | .331/.937                                  |
| Growth mindset gain correlates with mindset at pre-visit | Correlation ( <i>r</i> )    | 2.280/.999                                  | .736/.998                                  |
| SEM (mindset at pre-visit → math skills at post-visit)   | Path coefficient            | .442/.620                                   | .448/.440 <sup>1</sup>                     |
| <b>Neuroimaging</b>                                      |                             | ( <i>n</i> = 38)                            | ( <i>n</i> = 17)                           |
| Activation in the left dACC                              | Correlation ( <i>r</i> )    | 1.317/.959                                  | .387/.659                                  |
| Activation in the right dACC                             | Correlation ( <i>r</i> )    | .802/.647                                   | .120/.322                                  |
| Activation in the right striatum                         | Correlation ( <i>r</i> )    | .718/.558                                   | .402/.271                                  |
| Activation in the right hippocampus                      | Correlation ( <i>r</i> )    | 1.097/.880                                  | .402/.520                                  |
| Connectivity between the right dACC and left dACC        | Correlation ( <i>r</i> )    | .774/.619                                   | .173/.305                                  |
| Connectivity between the right dACC and right striatum   | Correlation ( <i>r</i> )    | 1.005/.824                                  | .530/.458                                  |

<sup>1</sup>Data available from 24 children were included in the control group for SEM analysis.

**Supplementary Table 4.** Correlation matrix in the training group

|                         | 1       | 2       | 3        | 4       | 5       | 6      | 7     | 8       | 9     |
|-------------------------|---------|---------|----------|---------|---------|--------|-------|---------|-------|
| <b>Time 1 (Pre)</b>     |         |         |          |         |         |        |       |         |       |
| 1 Age                   | -       |         |          |         |         |        |       |         |       |
| 2 FSIQ                  | -.039   | -       |          |         |         |        |       |         |       |
| 3 Growth mindset        | .026    | .303*   | -        |         |         |        |       |         |       |
| 4 Math fluency          | -.125   | .155    | .072     | -       |         |        |       |         |       |
| 5 Addition accuracy     | .167    | .477*** | .27#     | .449**  | -       |        |       |         |       |
| <b>Time 2 (Post)</b>    |         |         |          |         |         |        |       |         |       |
| 6 Age                   | .988*** | -.022   | .052     | -.15    | .156    | -      |       |         |       |
| 7 Growth mindset        | -.272#  | -.058   | .504***  | -.197   | -.059   | -.247# | -     |         |       |
| 8 Math fluency          | -.028   | .296*   | .265#    | .693*** | .595*** | -.058  | -.092 | -       |       |
| 9 Addition accuracy     | .265#   | .294#   | .247     | .218    | .628*** | .254#  | .15   | .384*   | -     |
| 10 Growth mindset gains | -.237#  | -.388** | -.752*** | -.232#  | -.357*  | -.248# | .19   | -.372** | -.165 |

Notes: #  $p < .10$ ; \*  $p < .05$ ; \*\*  $p < .01$ ; \*\*\*  $p < .001$ .

**Supplementary Table 5.** Correlation matrix in the control group

|                         | 1       | 2     | 3       | 4       | 5     | 6    | 7     | 8    | 9    |
|-------------------------|---------|-------|---------|---------|-------|------|-------|------|------|
| <b>Time 1 (Pre)</b>     |         |       |         |         |       |      |       |      |      |
| 1 Age                   | -       |       |         |         |       |      |       |      |      |
| 2 FSIQ                  | .144    | -     |         |         |       |      |       |      |      |
| 3 Growth mindset        | -.047   | .111  | -       |         |       |      |       |      |      |
| 4 Math fluency          | .08     | .325# | -.232   | -       |       |      |       |      |      |
| 5 Addition accuracy     | -.182   | .204  | .249    | -.259   | -     |      |       |      |      |
| <b>Time 2 (Post)</b>    |         |       |         |         |       |      |       |      |      |
| 6 Age                   | .993*** | .158  | -.018   | .069    | -.166 | -    |       |      |      |
| 7 Growth mindset        | .064    | .198  | .863*** | -.08    | .132  | .081 | -     |      |      |
| 8 Math fluency          | .066    | .379# | -.426*  | .728*** | -.09  | .054 | -.263 | -    |      |
| 9 Addition accuracy     | .033    | .32   | -.052   | .176    | .47*  | .028 | .06   | .167 | -    |
| 10 Growth mindset gains | .211    | .15   | -.345#  | .303    | -.229 | .186 | .175  | .332 | .187 |

Notes: #  $p < .10$ ; \*  $p < .05$ ; \*\*  $p < .01$ ; \*\*\*  $p < .001$ .

**Supplementary Table 6.** Model comparison between baseline and constrained models in multi-group analysis

|                   | <i>df</i> | AIC    | BIC    | Chi-square | Chi-square difference | <i>df</i> difference | <i>p</i> |
|-------------------|-----------|--------|--------|------------|-----------------------|----------------------|----------|
| Baseline model    | 0         | 1456.4 | 1522.7 | .000       |                       |                      |          |
| Constrained model | 1         | 1458.8 | 1522.8 | 4.433      | 4.433                 | 1                    | .035     |

Abbreviations: AIC = Akaike information criterion; BIC = Bayesian information criterion.

**Supplementary Table 7.** Relationship between growth mindset gain (post-pre) and changes in brain activation (post-pre) when controlling for effects of age, IQ and changes in math skills (post-pre)

|                                      | Right<br>dACC | Left<br>dACC | Right<br>striatum | Right<br>hippocampus | Bilateral<br>NAc |
|--------------------------------------|---------------|--------------|-------------------|----------------------|------------------|
| <b>Training group</b>                |               |              |                   |                      |                  |
| Age at pre                           | .006          | -.020        | .017              | .042                 | .018             |
| IQ                                   | -.001         | -.001        | .000              | .001                 | .002             |
| Math skill gains<br>(Post – Pre)     | .001          | .000         | -.001             | -.001                | -.001            |
| Growth mindset gains<br>(Post – Pre) | <b>.062**</b> | .023         | .044#             | <b>.084**</b>        | .011             |
| <b>Control group</b>                 |               |              |                   |                      |                  |
| Age at pre                           | .006          | .005         | .032              | .029                 | .012             |
| IQ                                   | .003          | .001         | .000              | <b>.004*</b>         | -.002            |
| Math skill gains<br>(Post – Pre)     | .001          | .000         | -.002             | -.002                | .002             |
| Growth mindset gains<br>(Post – Pre) | .033          | .013         | -.033             | .044                 | <b>-.131**</b>   |

*Notes:* Values represent beta values for each predictor in multiple regression analysis. IQ was assessed by Full Scale IQ from WASI. Math skill was measured by Math Fluency from WJ-III.

#  $p < .10$ , \*  $p < .05$ , \*\*  $p < .01$ .

**Supplementary Table 8.** Bivariate correlation between changes in connectivity for each ROI-to-ROI link and growth mindset gains

| Link                     | Training group |                 |                      | Control group |                 |                      |
|--------------------------|----------------|-----------------|----------------------|---------------|-----------------|----------------------|
|                          | <i>r</i>       | <i>p</i> (unc.) | <i>p</i> (FDR corr.) | <i>r</i>      | <i>p</i> (unc.) | <i>p</i> (FDR corr.) |
| R.dACC-L.dACC            | .361           | <b>.026</b>     | <b>.078</b>          | .086          | .743            | .939                 |
| R.dACC-R.Striatum        | .449           | <b>.005</b>     | <b>.028</b>          | .256          | .321            | .642                 |
| R.dACC-R.Hippocampus     | .160           | .339            | .508                 | .462          | <b>.062</b>     | .370                 |
| L.dACC-R.Striatum        | .303           | <b>.065</b>     | .130                 | .027          | .917            | .939                 |
| L.dACC-R.Hippocampus     | .012           | .944            | .944                 | .256          | .321            | .642                 |
| R.Striatum-R.Hippocampus | -.066          | .693            | .832                 | -.020         | .939            | .939                 |

Abbreviations: dACC = dorsal anterior cingulate cortex; L = left; R = right; unc. = uncorrected;

FDR corr. = FDR corrected.

**Supplementary Table 9.** ANOVA and paired *t*-tests for changes in addition fMRI task accuracy in MLD and TD groups in the training group

|                      | <i>F</i>     | <i>df</i> <sub>1</sub> , <i>df</i> <sub>2</sub> | <i>p</i>                                       |
|----------------------|--------------|-------------------------------------------------|------------------------------------------------|
| Omnibus ANOVA        |              |                                                 |                                                |
| Group (MLD vs. TD)   | 5.118        | 1, 43                                           | <b>.029</b>                                    |
| Time                 | 6.890        | 1, 43                                           | <b>.012</b>                                    |
| Group * Time         | 3.313        | 1, 43                                           | <b>.076</b>                                    |
|                      | Time 1 (Pre) | Time 2 (Post)                                   | Paired <i>t</i> -test                          |
| Group                | Mean (SD)    | Mean (SD)                                       |                                                |
| MLD ( <i>n</i> = 16) | .72 (.15)    | .82 (.11)                                       | <i>t</i> (15) = -2.803, <b><i>p</i> = .013</b> |
| TD ( <i>n</i> = 29)  | .84 (.17)    | .87 (.12)                                       | <i>t</i> (28) = -1.070, <i>p</i> = .294        |

**Supplementary Table 10.** ANOVA and paired *t*-tests for changes in WJ-III Math Fluency in MLD and TD groups in the training group

|                     | <i>F</i>       | <i>df</i> <sub>1</sub> , <i>df</i> <sub>2</sub> | <i>p</i>                                      |
|---------------------|----------------|-------------------------------------------------|-----------------------------------------------|
| Omnibus ANOVA       |                |                                                 |                                               |
| Group (MLD vs. TD)  | 31.810         | 1, 49                                           | <b>&lt;.001</b>                               |
| Time                | 1.074          | 1, 49                                           | .305                                          |
| Group * Time        | 7.268          | 1, 49                                           | <b>.010</b>                                   |
|                     | Time 1 (Pre)   | Time 2 (Post)                                   | Paired <i>t</i> -test                         |
| Group               | Mean (SD)      | Mean (SD)                                       |                                               |
| MLD ( <i>n</i> =20) | 84.50 (3.65)   | 90.40 (9.14)                                    | <i>t</i> (19) = -3.183, <b><i>p</i> =.005</b> |
| TD ( <i>n</i> = 31) | 103.34 (11.29) | 101.90 (13.08)                                  | <i>t</i> (30) = .817, <i>p</i> =.420          |



87 **Supplementary References**

- 88 Chang, H., Chen, L., Zhang, Y., Xie, Y., Adair, E., de los Angeles, C., Zanitti, G., Wassermann,  
89 D., Rosenberg-Lee, M., & Menon, V. (2022). Foundational number sense training gains  
90 are predicted by hippocampal – parietal circuits. *Journal of Neuroscience*, *42*, 4000-4015.
- 91 Dweck, C. S. (1999). *Self-Theories: Their Role in Motivation, Personality, and Development*.  
92 Psychol. Press.
